# Supplementary material
Source: PubMed Central journal article supplement (PMC2694335)

Supplemental data for:

**Positive- and Negative-Tandem Mass Spectrometric Fingerprints of Lipids from  
the Halophilic Archaea *Haloarcula marismortui***

Lauro M. de Souza, Marcelo Müller-Santos, Marcello Iacomini, Philip A. J. Gorin and  
Guilherme L. Sasaki\*

*Departamento de Bioquímica e Biologia Molecular, Universidade Federal do Paraná, CP  
19046, CEP 81531-980, Curitiba-PR, Brazil.*

**Running title:** Mass Spectrometric Fingerprints of Lipids from *Haloarcula marismortui*

\*To whom correspondence should be addressed:

Prof. Guilherme L. Sasaki, Ph.D.

Depto. Bioquímica e Biologia Molecular, Universidade Federal do Paraná,

CP 19046, CEP 81531-980, Curitiba-PR, Brazil.

Tel: +55-41-3361-1577; fax: +55-41-3266-2042.

E-mail address: [sasaki@ufpr.br](mailto:sasaki@ufpr.br)

## Figure Legends

**Figure S-1** – (A)  $^{13}\text{C}$ -NMR spectrum of total polar lipid fraction from *H. marismortui*. Carbohydrates appear as their anomeric region at  $\delta$  97 – 104. Signals of the phytanyl chain were present at  $\delta$  20.3 and  $\delta$  23.1 ( $\text{CH}_3$ ), and tertiary carbons ( $\text{CH}$ ) between  $\delta$  28.78 and 33.64. Small signals arising from double bonds are present between  $\delta$  120 – 140, and  $\text{CH}_3$  groups from the unsaturated chain are between  $\delta$  15 – 17. (B)  $^{13}\text{C}$ -DEPT spectrum showing the chemical shifts from  $\text{CH}_2$ , occurring between  $\delta$  25.2 – 25.6 and  $\delta$  37.6 – 40.2, with  $\text{CH}_2\text{-O}$  between  $\delta$  68.1-71.0.

**Figure S-2** –  $^1\text{H}$ -NMR spectrum of total polar lipid fraction from *H. marismortui*. The amplified region between  $\delta$  5.0 and 5.5 indicates the presence of olefinic protons of double bonds.

**Figure S-3** – (A) Unsaturated archaeol structure showing connectivities of  $\text{CH}_3$  groups and olefinic protons, as detected by HMQC and COSY. (B)  $^1\text{H}$ ,  $^{13}\text{C}$  HMQC spectrum showing, in amplified squares, the connectivities of  $^1\text{H}/^{13}\text{C}$  of methylic side-chain carbons in the unsaturated phytanyl chain at  $\delta$  1.57/16.45 (H/C 18/18' and 19,19') and 1.65/16.9 (H/C 17,17'), as well as those of olefinic protons with carbons in double bonds, at  $\delta$  5.31/121.6 (H/C 2,2'), 5.08/124.9 (H/C 6,6') and 5.10/126.0 (H/C-10,10'). (C) Partial  $^1\text{H}/^1\text{H}$  COSY spectrum of total polar lipid fraction, showing connectivities between methylic and olefinic protons at  $\delta$  1.57/5.08 (H6,6'/H18,18' and H10,10'/H19,19') and 1.65/5.31 (H2,2'/H17,17')..

**Figure S-4** – (A)  $^{13}\text{C}$  and (B)  $^{13}\text{C}$ -DEPT NMR spectra of purified triglycosyl archaeol. The anomeric region from carbohydrates is consistent with the presence of units of  $\beta$ -Glc<sub>p</sub> at  $\delta$  104.2 ( $J_{\text{C-1/H-1}} = 158.5$  Hz),  $\alpha$ -Glc<sub>p</sub> at  $\delta$  99.3 ( $J_{\text{C-1/H-1}} = 168.8$  Hz) and  $\alpha$ -Man<sub>p</sub> at  $\delta$  97.4 ( $J_{\text{C-1/H-1}} = 168.1$  Hz). Signals of the phytanyl chain are distributed between  $\delta$  20 and 71, as those in Figure S-2.

Figure S-1

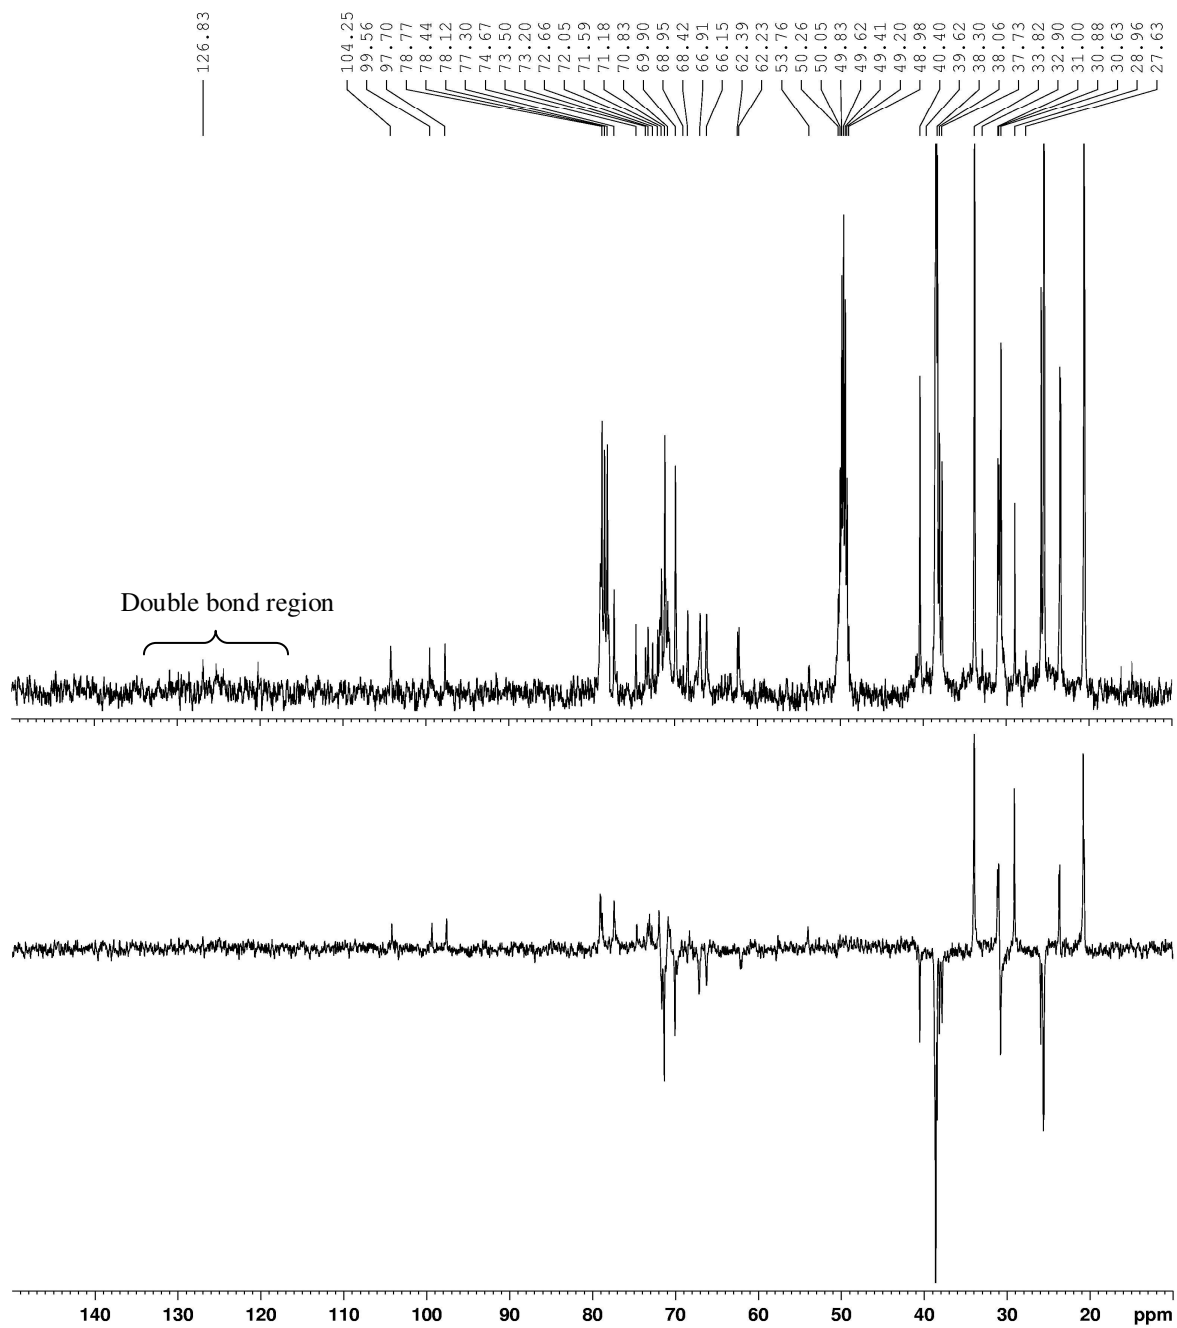

**Figure S-2**

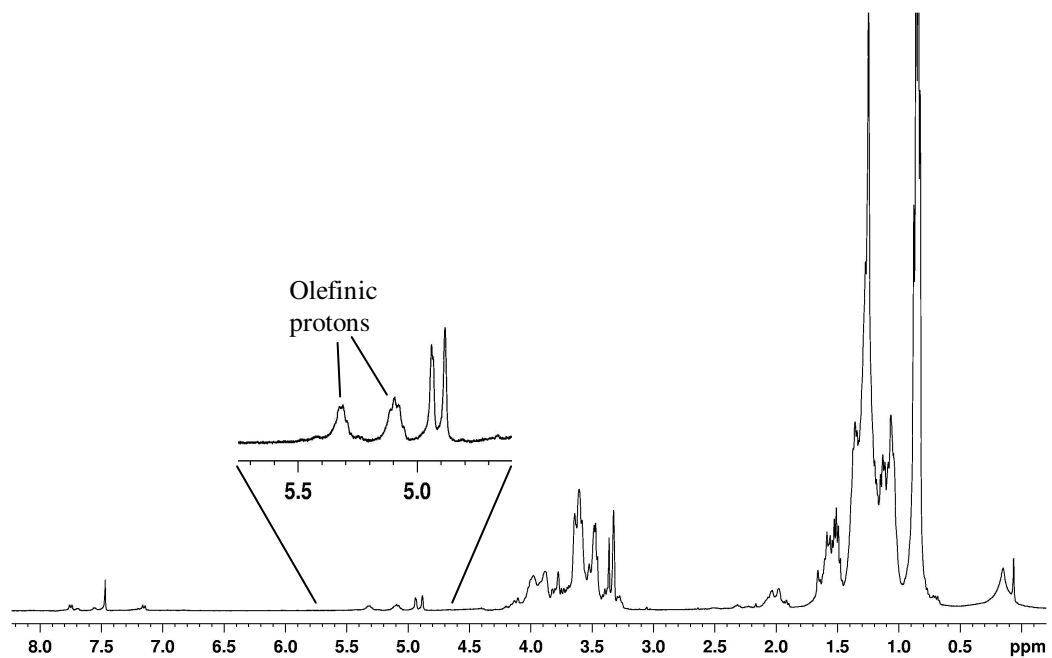

Figure S-3

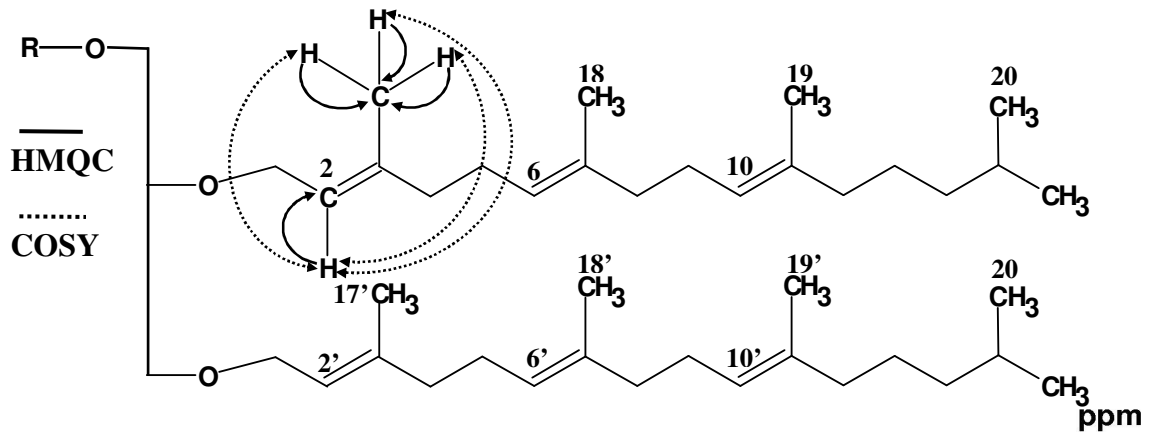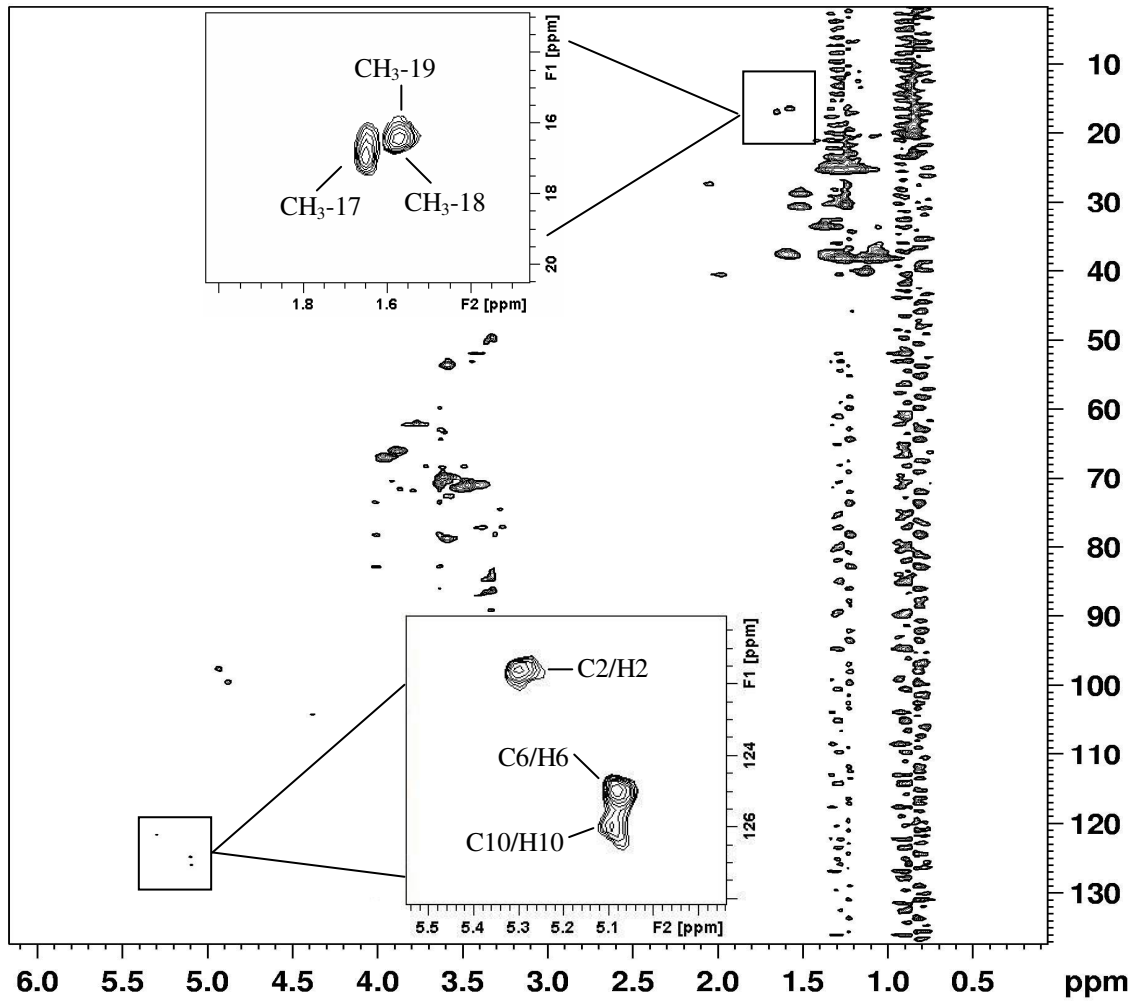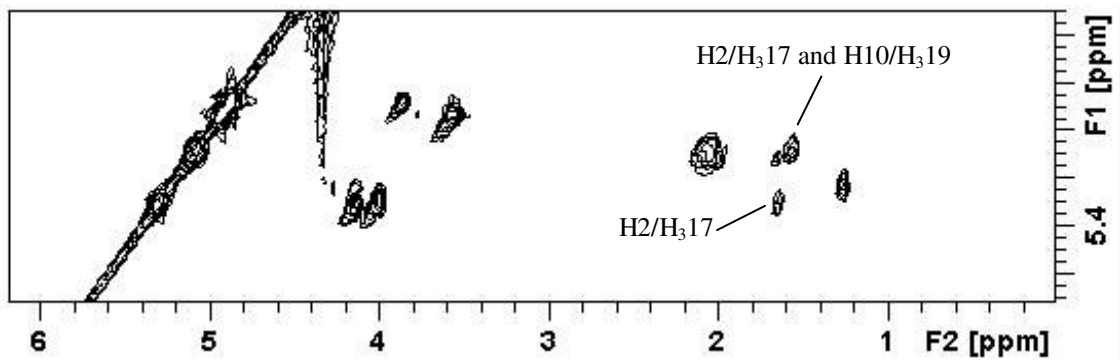

Figure S-4

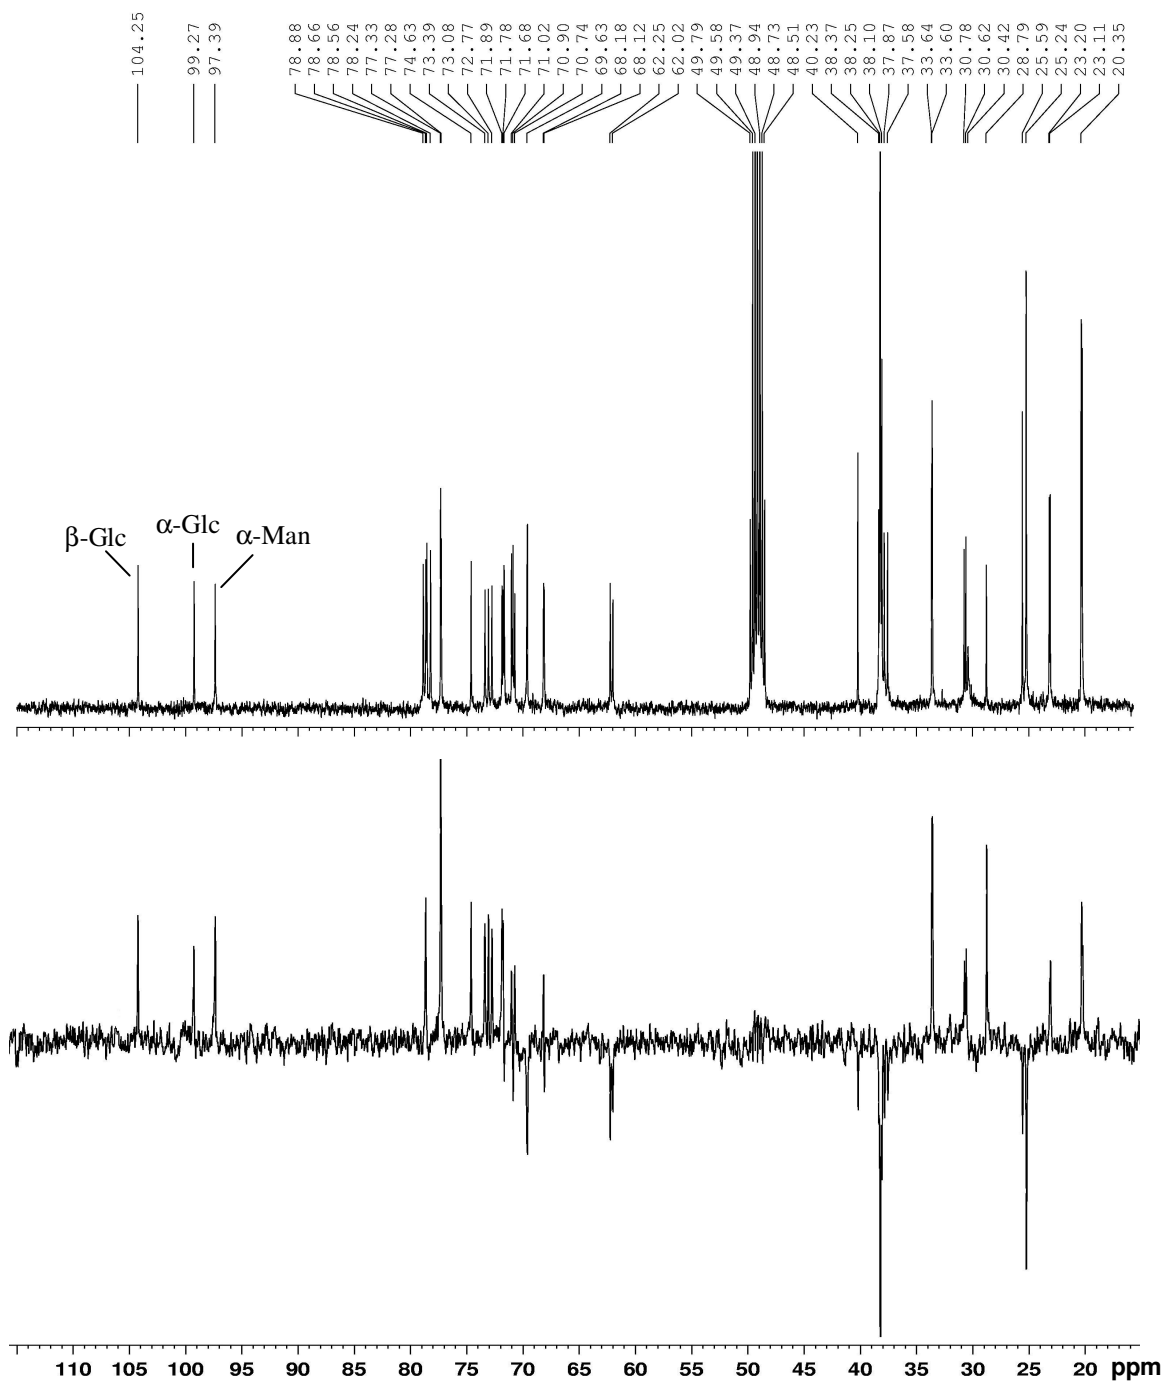

Supplement: supp_M800478-JLR200_JLR_supplemental_data.pdf [file supp_M800478-JLR200_JLR_supplemental_data.pdf]
